# Supplementary material
Source: PubMed Central journal article supplement (PMC4257701)
Supplement: NIHMS554887-supplement-Appendix_2.pdf [file NIHMS554887-supplement-Appendix_2.pdf]

Date \_\_\_\_/\_\_\_\_/\_\_\_\_

**This questionnaire asks about HIV tests and when, where, and why you test. Please follow the instructions in bold print and answer the questions in order. Please do not go back or skip ahead unless there is a question you do not want to answer. If you do not want to answer a question, you may skip that one.**

|                                                                                                                                                                                                                                                                                                                                                                                                                                                                                                                                                                                                                                                                                                      |                                                               |                                                 |                                 |                                                          |                                           |                                                    |  |                                           |
|------------------------------------------------------------------------------------------------------------------------------------------------------------------------------------------------------------------------------------------------------------------------------------------------------------------------------------------------------------------------------------------------------------------------------------------------------------------------------------------------------------------------------------------------------------------------------------------------------------------------------------------------------------------------------------------------------|---------------------------------------------------------------|-------------------------------------------------|---------------------------------|----------------------------------------------------------|-------------------------------------------|----------------------------------------------------|--|-------------------------------------------|
| <p>1. Have you heard or seen or received information about HIV that included the phrase "RU2hot"? (Check one.)</p> <ul style="list-style-type: none"><li><input type="checkbox"/> yes (1)</li><li><input type="checkbox"/> no (2)</li><li><input type="checkbox"/> I don't know (3)</li></ul>                                                                                                                                                                                                                                                                                                                                                                                                        |                                                               |                                                 |                                 |                                                          |                                           |                                                    |  |                                           |
| <p>2. When people get HIV infected, they go through different stages from the time of infection, through asymptomatic HIV, to AIDS. What part of HIV infection did the "RU2hot?" campaign talk about?</p> <hr/> <hr/>                                                                                                                                                                                                                                                                                                                                                                                                                                                                                |                                                               |                                                 |                                 |                                                          |                                           |                                                    |  |                                           |
| <p>3. What do you think the phrase "RU2hot?" means?</p> <hr/> <hr/>                                                                                                                                                                                                                                                                                                                                                                                                                                                                                                                                                                                                                                  |                                                               |                                                 |                                 |                                                          |                                           |                                                    |  |                                           |
| <p>4. Most people will have some symptoms in the first 1-4 weeks after getting infected with HIV. Examples of "symptoms" include things like "cough" or "runny nose". If you know any of the symptoms that can occur during primary HIV infection please list them below: <b>(Please write down as many <u>specific</u> symptoms of primary HIV infection as you can.)</b></p> <hr/> <hr/>                                                                                                                                                                                                                                                                                                           |                                                               |                                                 |                                 |                                                          |                                           |                                                    |  |                                           |
| <p>4. During the "window period", people who have primary HIV infection may have a negative blood test for HIV antibody but a positive test for HIV RNA (sometimes called a "viral load"). Where are the HIV testing sites in Seattle where HIV RNA testing is routinely done to test for HIV infection?</p> <hr/>                                                                                                                                                                                                                                                                                                                                                                                   |                                                               |                                                 |                                 |                                                          |                                           |                                                    |  |                                           |
| <p>5. Have you ever gone to get an HIV RNA test because you were concerned about symptoms?</p> <table style="width: 100%; border: none;"><tr><td style="width: 60%; padding-left: 20px;"><input type="checkbox"/> yes (1) -----When was the last time?</td><td><input type="checkbox"/> less than 6 months ago</td></tr><tr><td style="padding-left: 20px;"><input type="checkbox"/> no (2)</td><td><input type="checkbox"/> between 6 months and 1 year ago</td></tr><tr><td style="padding-left: 20px;"><input type="checkbox"/> I don't know (3)</td><td><input type="checkbox"/> between 1 and 2 years ago</td></tr><tr><td></td><td><input type="checkbox"/> over 2 years ago</td></tr></table> | <input type="checkbox"/> yes (1) -----When was the last time? | <input type="checkbox"/> less than 6 months ago | <input type="checkbox"/> no (2) | <input type="checkbox"/> between 6 months and 1 year ago | <input type="checkbox"/> I don't know (3) | <input type="checkbox"/> between 1 and 2 years ago |  | <input type="checkbox"/> over 2 years ago |
| <input type="checkbox"/> yes (1) -----When was the last time?                                                                                                                                                                                                                                                                                                                                                                                                                                                                                                                                                                                                                                        | <input type="checkbox"/> less than 6 months ago               |                                                 |                                 |                                                          |                                           |                                                    |  |                                           |
| <input type="checkbox"/> no (2)                                                                                                                                                                                                                                                                                                                                                                                                                                                                                                                                                                                                                                                                      | <input type="checkbox"/> between 6 months and 1 year ago      |                                                 |                                 |                                                          |                                           |                                                    |  |                                           |
| <input type="checkbox"/> I don't know (3)                                                                                                                                                                                                                                                                                                                                                                                                                                                                                                                                                                                                                                                            | <input type="checkbox"/> between 1 and 2 years ago            |                                                 |                                 |                                                          |                                           |                                                    |  |                                           |
|                                                                                                                                                                                                                                                                                                                                                                                                                                                                                                                                                                                                                                                                                                      | <input type="checkbox"/> over 2 years ago                     |                                                 |                                 |                                                          |                                           |                                                    |  |                                           |
| <p>6. If you were worried that one of your recent sex partners might have HIV, how likely would you be to get an HIV test? (Check one.)</p> <ul style="list-style-type: none"><li><input type="checkbox"/> very unlikely (1)</li><li><input type="checkbox"/> somewhat unlikely (2)</li><li><input type="checkbox"/> somewhat likely (3)</li><li><input type="checkbox"/> very likely (4)</li></ul>                                                                                                                                                                                                                                                                                                  |                                                               |                                                 |                                 |                                                          |                                           |                                                    |  |                                           |
| <p>7. If you were worried that one of your recent sex partners might have HIV, where would you go to get HIV tested? (Check one.)</p> <ul style="list-style-type: none"><li><input type="checkbox"/> I would go to my primary care provider (1)</li><li><input type="checkbox"/> I would go to an emergency room/urgent care clinic (2)</li><li><input type="checkbox"/> I would go to the STD clinic at Harborview (3)</li><li><input type="checkbox"/> I would go to another clinic (4) – which one? _____</li><li><input type="checkbox"/> I would take care of myself without going to one of the clinics mentioned above (5)</li></ul>                                                          |                                                               |                                                 |                                 |                                                          |                                           |                                                    |  |                                           |

8. If you were worried that that one of your recent sex partners might have HIV, how long would you wait between having sex with that partner and having an HIV test? **(Check one.)**

less than 1 week (1)  
 1 to 2 weeks (2)  
 2 to 4 weeks (3)  
 4 to 6 weeks (4)  
 more than 6 weeks (5)

---

9. How much did seeing the "RU2hot?" campaign change your answers to questions #6-8? **(Check one.)**

not at all (1)  
 a little bit (2)  
 a great deal (3)  
 I didn't see the campaign (4)

---

10. If you thought you had symptoms that might be primary HIV infection after you had sex with someone without a condom, how likely would you be to get an HIV test? **(Check one.)**

very unlikely (1)  
 somewhat unlikely (2)  
 somewhat likely (3)  
 very likely (4)

---

11. If you thought you had symptoms that might be primary HIV infection after you had sex with someone without a condom, where would you go to get HIV tested? **(Check one.)**

I would go to my primary care provider (1)  
 I would go to an emergency room/urgent care clinic (2)  
 I would go to the STD clinic at Harborview (3)  
 I would go to another clinic (4) – which one? \_\_\_\_\_  
 I would take care of myself without going to one of the clinics mentioned above (5)

---

12. If you thought you had symptoms that might be primary HIV infection after you had sex with someone without a condom, how long would you wait between the start of symptoms and having an HIV test? **(Check one.)**

less than 1 week (1)  
 1 to 2 weeks (2)  
 2 to 4 weeks (3)  
 4 to 6 weeks (4)  
 more than 6 weeks (5)

---

13. How much did seeing the "RU2hot?" campaign change your answers to questions #10-12? **(Check one.)**

not at all (1)  
 a little bit (2)  
 a great deal (3)  
 I didn't see the campaign (5)

---

14. Some people find some symptoms more or less concerning than others. If you had recent unprotected sex with someone you did not know, and then two weeks later you had each of the following symptom(s) for five days, how likely would you be to go to your doctor or another clinic?

|                                                         | very<br>unlikely         | somewhat<br>unlikely     | somewhat<br>likely       | very<br>likely           |
|---------------------------------------------------------|--------------------------|--------------------------|--------------------------|--------------------------|
| a. fever and sore throat                                | <input type="checkbox"/> | <input type="checkbox"/> | <input type="checkbox"/> | <input type="checkbox"/> |
| b. non-itchy rash on your chest and back                | <input type="checkbox"/> | <input type="checkbox"/> | <input type="checkbox"/> | <input type="checkbox"/> |
| c. non-itchy rash that your partner also has            | <input type="checkbox"/> | <input type="checkbox"/> | <input type="checkbox"/> | <input type="checkbox"/> |
| d. a runny nose and cough                               | <input type="checkbox"/> | <input type="checkbox"/> | <input type="checkbox"/> | <input type="checkbox"/> |
| e. a painless sore on your penis or butt                | <input type="checkbox"/> | <input type="checkbox"/> | <input type="checkbox"/> | <input type="checkbox"/> |
| f. a painful sore on your penis or butt                 | <input type="checkbox"/> | <input type="checkbox"/> | <input type="checkbox"/> | <input type="checkbox"/> |
| g. sores in your mouth                                  | <input type="checkbox"/> | <input type="checkbox"/> | <input type="checkbox"/> | <input type="checkbox"/> |
| h. swollen lymph nodes in your neck                     | <input type="checkbox"/> | <input type="checkbox"/> | <input type="checkbox"/> | <input type="checkbox"/> |
| i. flu-like symptoms (fever and muscle aches)           | <input type="checkbox"/> | <input type="checkbox"/> | <input type="checkbox"/> | <input type="checkbox"/> |
| j. sweating at night so much that you drench the sheets | <input type="checkbox"/> | <input type="checkbox"/> | <input type="checkbox"/> | <input type="checkbox"/> |

**Thank you very much for your time in filling out this questionnaire.**
